# Supplementary material for: Highly ordered sandwich-type (phthalocyaninato)(porphyrinato) europium double-decker nanotubes and room temperature NO2 sensitive properties
Source: Royal Society of Chemistry journal article supplement (doi:10.1039/c6dt04257k), 2016-12-28
Supplement: c6dt04257k1.pdf [file c6dt04257k1.pdf]

**Electronic Supplementary Information**

**Highly ordered sandwich-type  
(phthalocyaninato)(porphyrinato) europium double-deckers  
nanotubes and room temperature NO<sub>2</sub> sensitive properties**

Peihua Zhu,<sup>\*a</sup> Yucheng Wang,<sup>a</sup> Pan Ma,<sup>ab</sup> Feifei Song,<sup>a</sup> Xinyu Han,<sup>a</sup> Shuncheng Yao<sup>a</sup>  
and Cheng Yang<sup>a</sup>

<sup>a</sup>Key Laboratory of Chemical Sensing & Analysis in University of Shandong, School  
of Chemistry and Chemical Engineering, University of Jinan, Jinan 250022, China

<sup>b</sup>Jinan Academy of Agricultural Sciences, Jinan, 250316, PR China

\*Corresponding author.

E-mail: chm\_zhuph@ujn.edu.cn (P.H. Zhu).

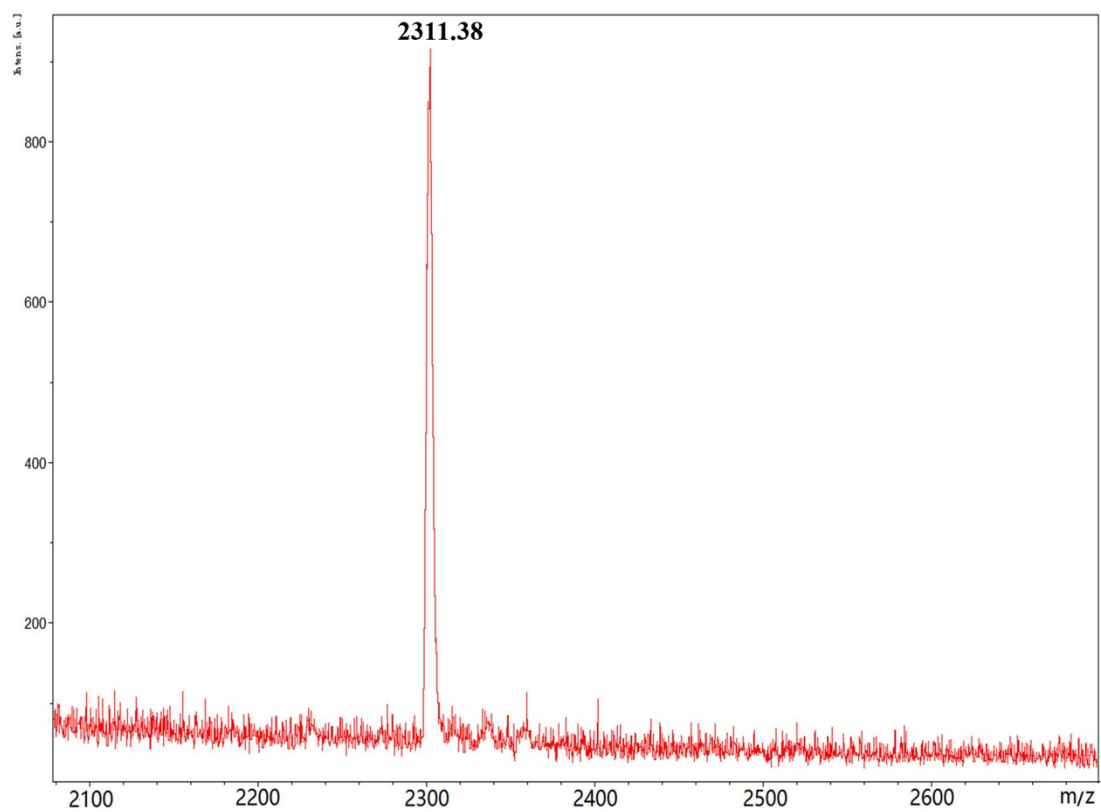

**Fig. S1** MALDI-TOF mass spectrum of compound **2**.

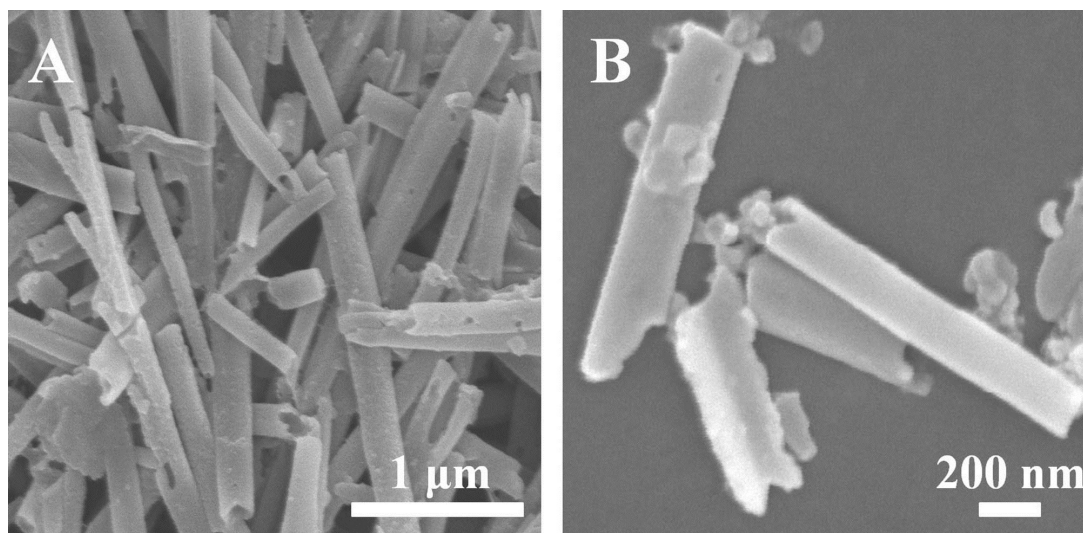

**Fig. S2** The nanotubes fabricated from **2** using AAO as template observed by SEM after ultrasound (A); nanotubes prepared from **2** indicate the open ends of these nanotubes (B).

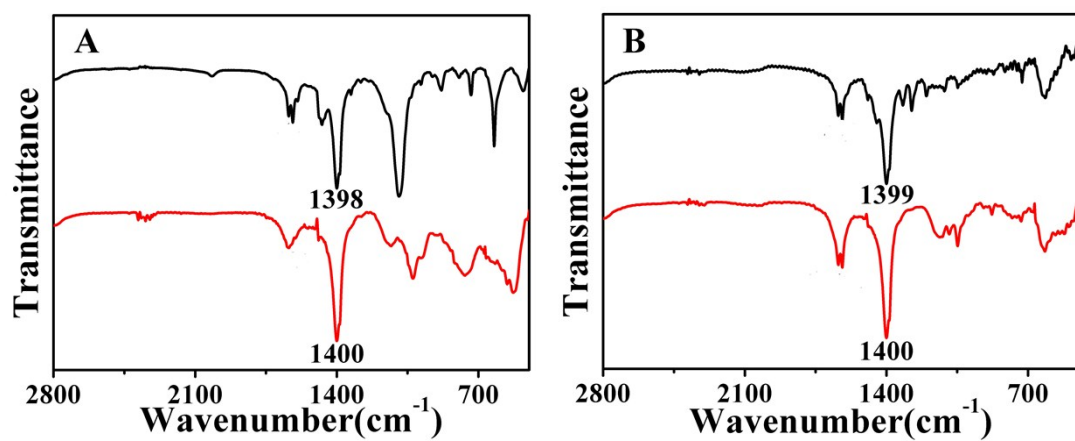

**Fig. S3** IR spectra of compound **1** (A) and **2** (B) (black line) and its nanotubes (red line) fabricated from **1-2** in the region of 450-2800 cm<sup>-1</sup> with 2 cm<sup>-1</sup> resolution.

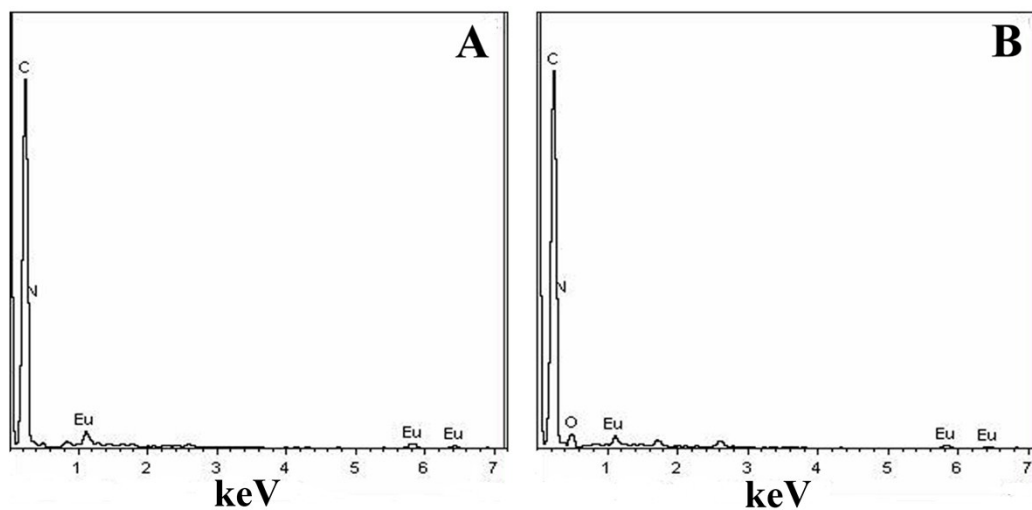

**Fig. S4** EDS images of nanotubes fabricated from compound **1** nanotubes (A) and **2** nanotubes (B).

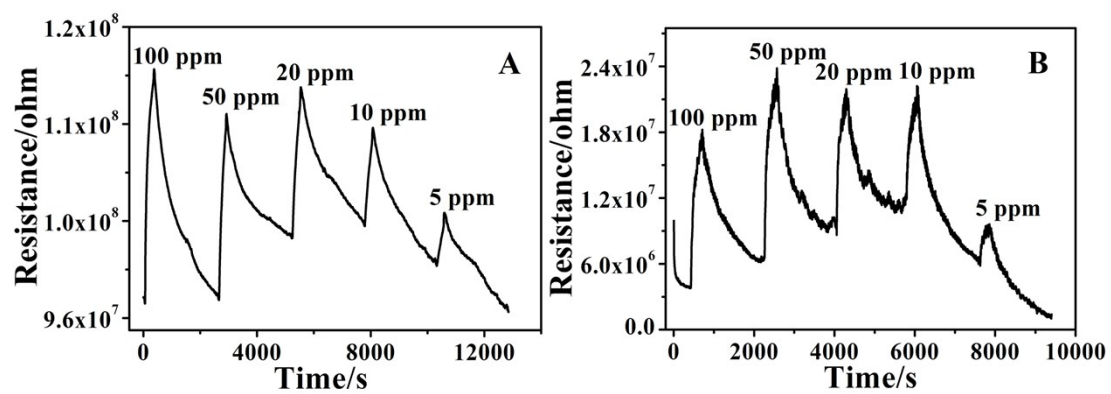

**Fig. S5** Real-time response characteristics of the drop-cast films of compound 1 (A) and compound 2 (B).

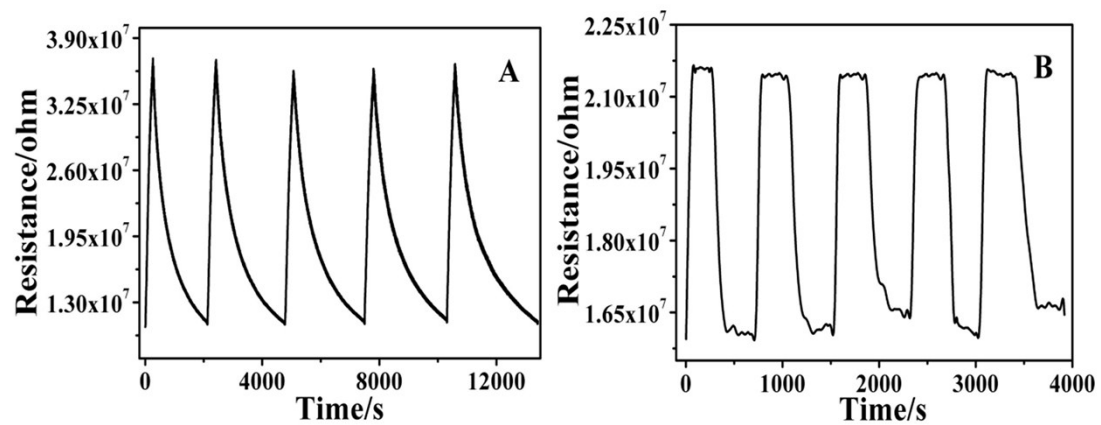

**Fig. S6** Dynamic responses of the nanotubes of sensors to 100 ppm NO<sub>2</sub> at ambient temperature: (A) compound **1** nanotubes; (B) compound **2** nanotubes.

**Table S1** Electronic absorption data for compounds **1-2** in chloroform solutions and corresponding nanotubes dispersed in distilled water.

| Compound | in CHCl <sub>3</sub> /nm | nanotubes/nm            |
|----------|--------------------------|-------------------------|
| <b>1</b> | 331, 411, 480, 605, 692  | 338, 417, 484, 582, 645 |
| <b>2</b> | 335, 413, 482, 608, 683  | 386, 463, 499, 625, 690 |
